# Supplementary material
Source: PubMed Central journal article supplement (PMC4119084)
Supplement: cbt-15-992-s01.pdf [file cbt-15-992-s01.pdf]

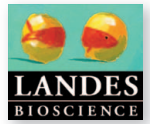

## **Supplemental Material to:**

**Wei Chen, Qi-Da Hu, Xue-Feng Xia, Chao Liang, Hao Liu,  
Qi Zhang, Tao Ma, and Ting-Bo Liang**

**Rapamycin enhances cetuximab cytotoxicity by inhibiting  
mTOR-mediated drug resistance in mesenchymal  
hepatoma cells**

**Cancer Biology & Therapy 2014; 15(8)**

**<http://dx.doi.org/10.4161/cbt.29113>**

**[http://www.landesbioscience.com/journals/cbt/article/29113 /](http://www.landesbioscience.com/journals/cbt/article/29113/)**

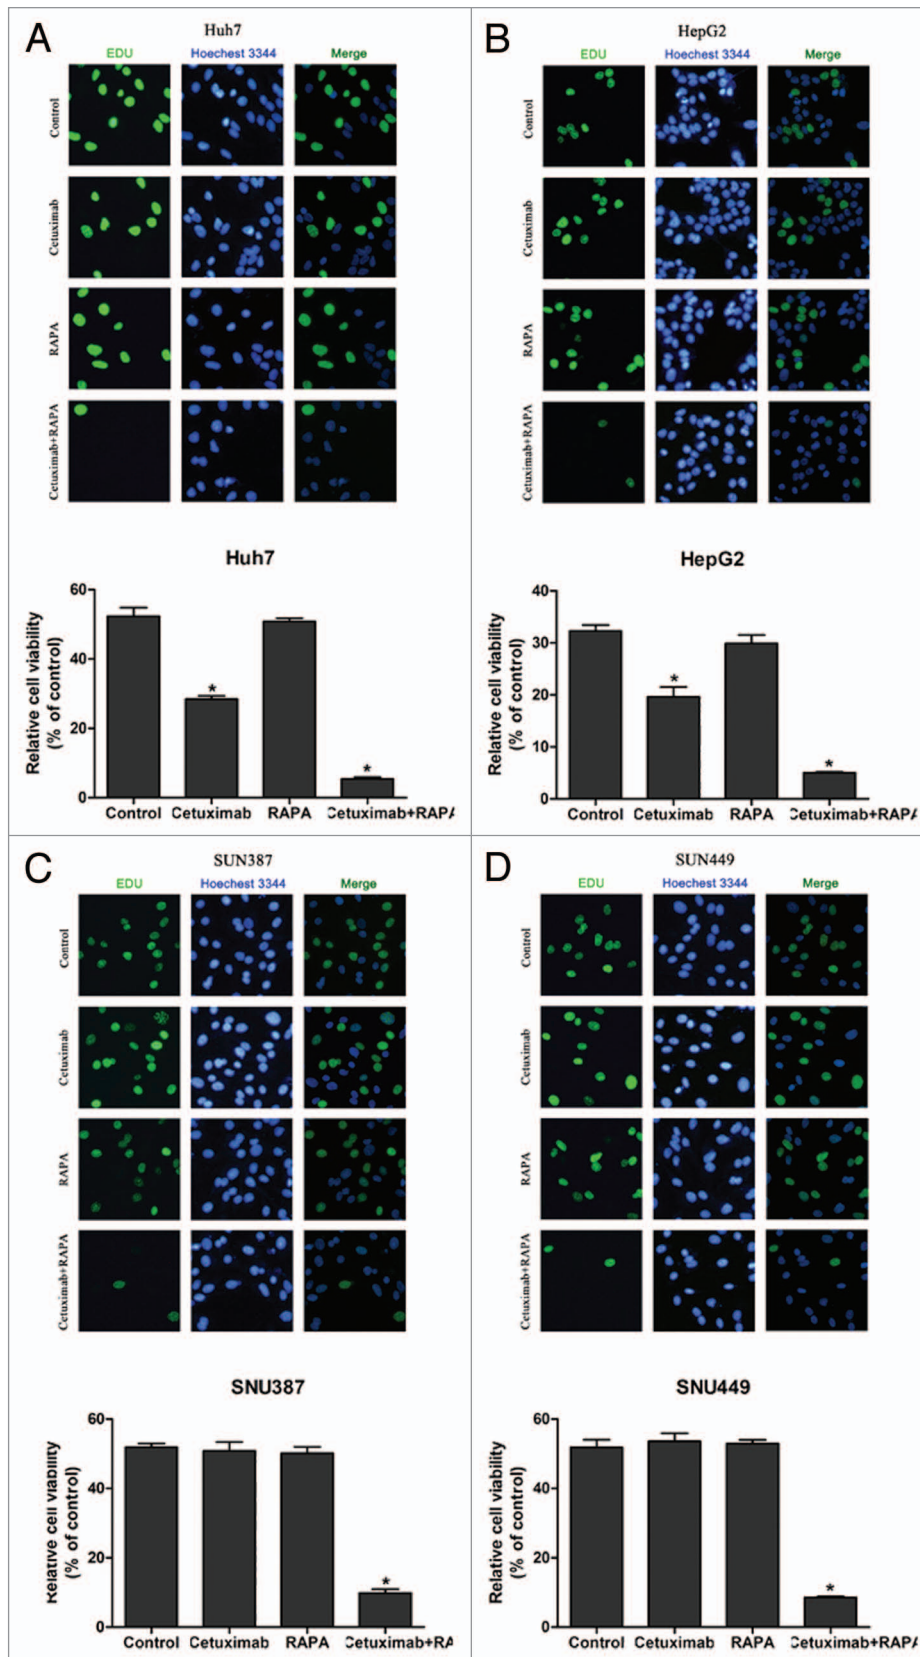

**Figure S1.** Cell proliferation in hepatocellular carcinoma cell lines. EdU incorporation assay was performed to measure the cell proliferation in Huh7 (A), HepG2 (B), SNU387 (C), and SNU449 (D).

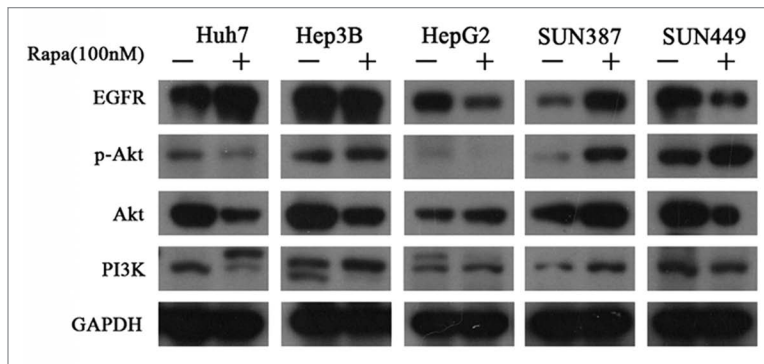

**Figure S2.** Expression of AKT and EGFR in hepatocellular carcinoma cell lines. Western blot was performed to detect the content of p-AKT and EGFR in several hepatocellular carcinoma cell lines.
